# Supplementary material for: Serum Metabolomic Patterns in Patients With Aldosterone-Producing Adenoma
Source: PubMed Central journal article supplement (PMC9023800; doi:10.3389/fmolb.2022.816469), 2022-04-08
Supplement: Table1.pdf [file Table1.pdf]

**Supplementary Table 1. Baseline characteristics of the participants**

|                          | EHT (n=9)   | APA (n=11) | p value     |
|--------------------------|-------------|------------|-------------|
| Age (years)              | 49 (14)     | 44 (14)    | <b>0.04</b> |
| SBP (mmHg)               | 154 (35.5)  | 147 (19)   | 0.95        |
| DBP (mmHg)               | 85 (20)     | 98 (14)    | 0.08        |
| BMI (kg/m <sup>2</sup> ) | 24.5 (5.35) | 24 (2.2)   | 0.56        |
| Sex                      |             |            | >0.99       |
| Male                     | 5           | 5          |             |
| Female                   | 4           | 6          |             |

Legend: SBP-systolic blood pressure, DBP-diastolic blood pressure, BMI-body mass index.
